# Supplementary material for: Phosphorylation of G3BP1-S149 does not influence stress granule assembly
Source: PubMed Central journal article supplement — J Cell Biol. 2019 Jun 6;218(7):2425–32. doi: 10.1083/jcb.201801214 (PMC6605800; doi:10.1083/jcb.201801214), 2019-06-06
Supplement: JCB_201801214_sm.pdf [file JCB_201801214_sm.pdf]

## Supplemental material

Panas et al., <https://doi.org/10.1083/jcb.201801214>

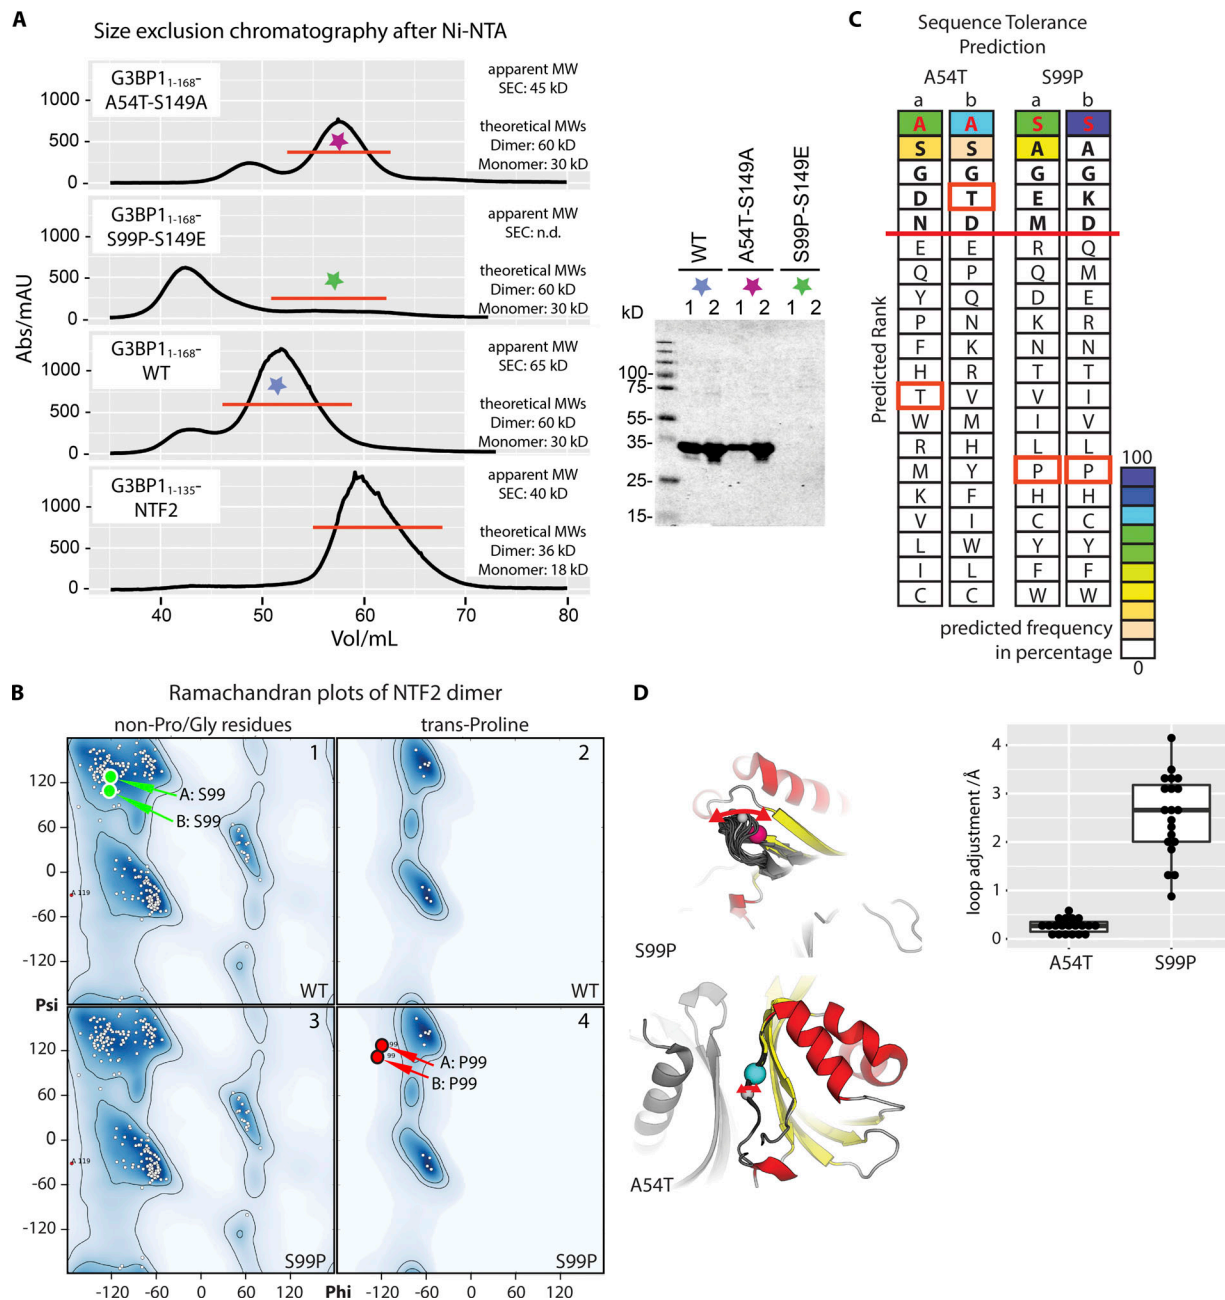

**Figure S1. The S99P mutation causes the aberrant behavior of the presumed S149E variant.** (A) Size exclusion and SDS-PAGE analysis of heterologously produced G3BP1<sub>1-168</sub> WT, S149A (unintentional A54T), and S149E (unintentional S99P) constructs. The size-exclusion chromatography profile of the NTF2-like G3BP1 domain (sequence-derived molecular weight [MW] is 18 kD) used for crystallization is shown for comparison. WT G3BP1<sub>1-168</sub> (30 kD) yielded a major peak at a retention volume of ~52 ml, corresponding to an apparent molecular weight of 65 kD, in agreement with the theoretical size of the dimer. The S149A (A54T) mutant eluted at ~58 ml corresponding to an apparent molecular weight of 45 kD, in between the monomer and dimer. For the S149E (S99P) construct, a major peak at the void volume of the column was obtained, indicating aggregated protein. SDS-PAGE analysis showed protein bands at the expected molecular weight of ~30 kD for the combined major peak fractions of G3BP1-WT and S149A (A54T). We did not detect any S149E (S99P) protein in the indicated fractions that were chosen based on the purification of the WT and S149A (A54T) protein. The major “void” peak was not analyzed in SDS-PAGE. Numbers 1 and 2 indicate before and after concentrating the combined fractions using ultracentrifugation. (B) In silico substitution of Ser-99 to Pro in monomers A and B shifts the formerly favored Phi/Psi angles of Ser (top 1, green arrows) into disallowed regions in the proline Ramachandran plot (bottom 4, red arrows). (C) The ranked table of residues with their respective predicted frequencies illustrates that both WT residues at positions 54 and 99 are favored in the two chains of the NTF2 dimer (a and b). The red line indicates a cutoff of the top five amino acid choices at each position. While threonine (red boxes) appears among the five highest ranked residues in one chain of the dimer, proline at position 99 (red boxes) is listed at the lower end of the ranked table of both chains. (D) “Backrub”-modeled structures of S99P mutants reveal a 2.5-Å perturbation of the Ser-99-associated loop. The models of A54T are almost identical to the WT structure with perturbations in the range of 0.2 Å. Cartoons were drawn and color-coded as in Fig. 1 B. The perturbation of the loops was measured as point-to-point distances of the highlighted WT Ca-atom (gray sphere) to the respective atom in the mutant structures.

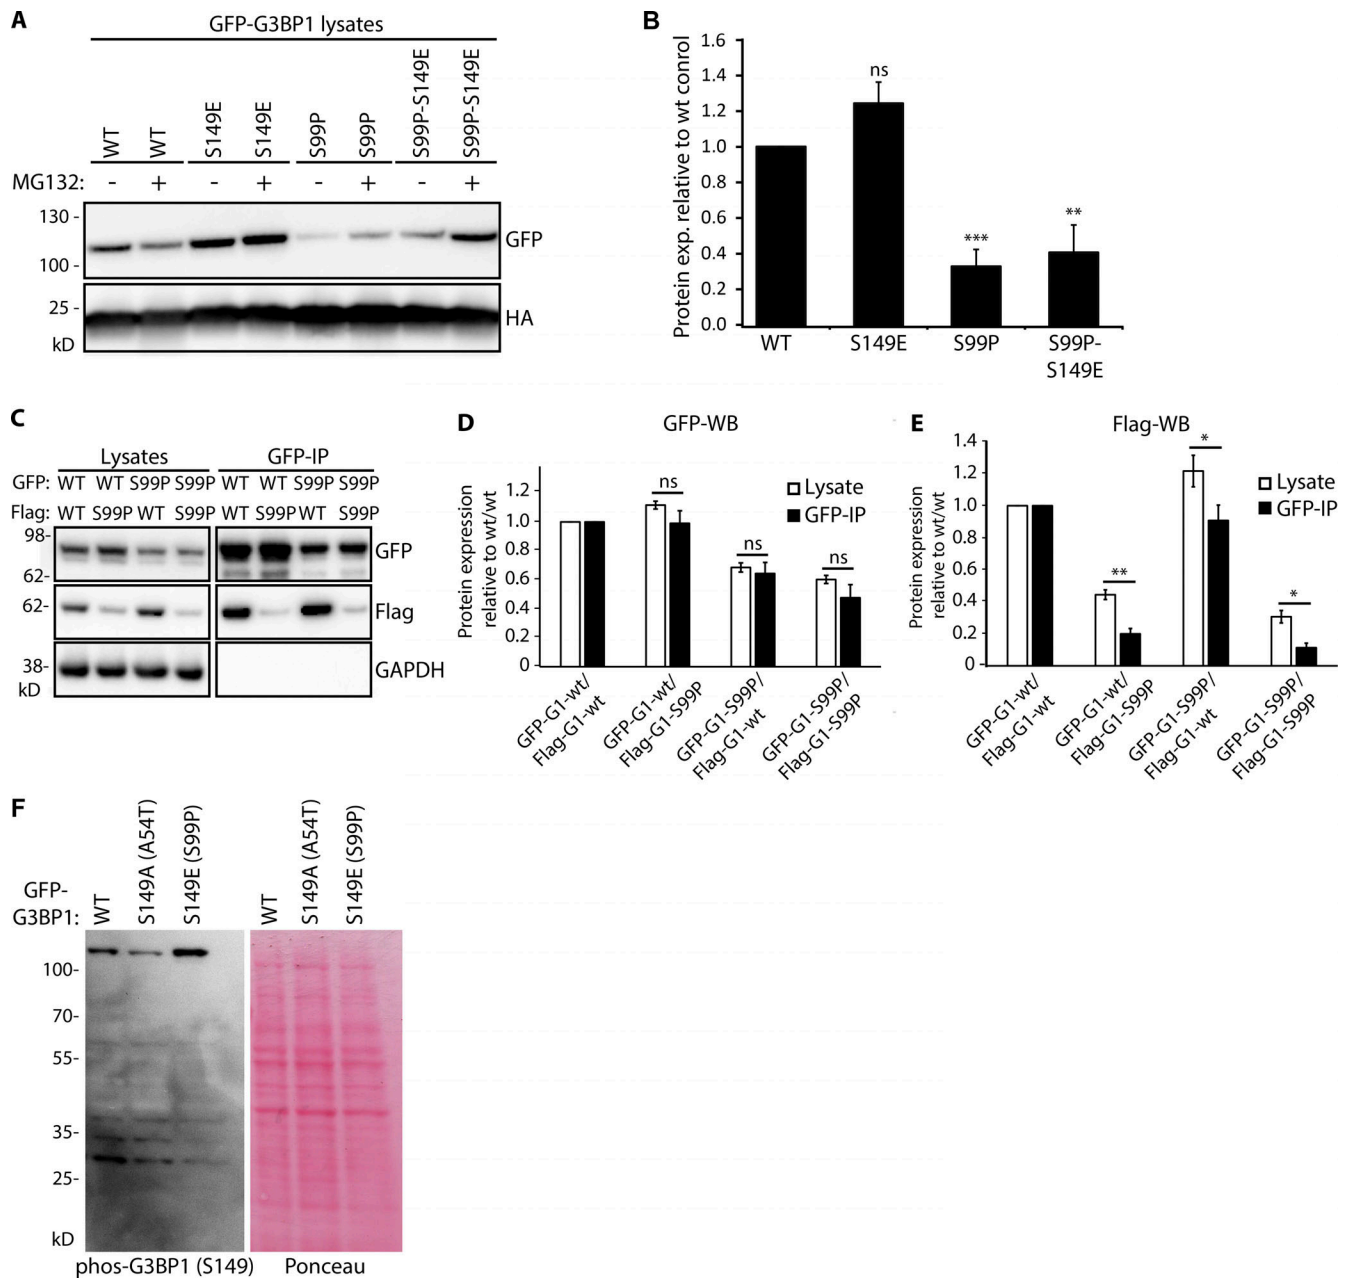

Figure S2. **S99P is less efficiently expressed and impaired in interacting with G3BP-WT and with itself.** (A) Transient coexpression of GFP-G3BP1 mutants with an HA-tagged reporter construct, untreated or treated with MG132 for 6 h, and blotted as indicated. (B) Coexpressed GFP-G3BP1 variants with an HA-tagged reporter, quantified by Western blot/densitometry for GFP and HA. GFP/HA expression was normalized relative to the WT, and plotted (mean  $\pm$  SEM,  $n = 3$ ). (C) Coexpression of indicated GFP-G3BP1 and Flag-G3BP1 constructs in  $\Delta\Delta$ G3BP1/2 U2OS cells, immunoprecipitated with GFP-TRAP, and blotted as indicated. (D) GFP quantified from lysates and GFP IP Western blots using densitometry. Relative values to WT/WT coexpression were plotted. Mean  $\pm$  SEM,  $n = 3$ . (E) Flag signal was quantified as in D (mean  $\pm$  SEM,  $n = 3$ ). (F)  $\Delta$ G3BP1 U2OS cells stably expressing GFP-G3BP1-WT, S149A (A54T), and S149E (S99P) lysed and separated by SDS-PAGE, membrane-stained with Ponceau (right panel), and then blotted for phos-G3BP1-S149 (left panel; G8046; Sigma-Aldrich).

Table S1. **Primer sequences**

| <b>Mutation</b> | <b>Plasmid</b>            | <b>Forward primer</b>                  | <b>Reverse primer</b>                   |
|-----------------|---------------------------|----------------------------------------|-----------------------------------------|
| A54T            | pEGFP-C1-G3BP1-WT         | 5'Phos-CCAGCAGATACTGTCTACGGACAGAAAG-3' | 5'Phos-CTTCCATTTGAATCCAATCCCCCATGGA-3'  |
| S99P            | pEGFP-C1-G3BP1-WT         | 5'Phos-GGGGCTTCTCCCTAACACAACCAGG-3'    | 5'Phos-ATCACCTGGACTACCACACCATCATTAGC-3' |
| S99P            | pcDNA-Flag-G3BP1-WT       | 5'Phos-GGGGCTTCTCCCTAACACAACCAGG-3'    | 5'Phos-ATCACCTGGACTACCACACCATCATTAGC-3' |
| S149A           | pEGFP-C1-G3BP1-A54T-S149A | 5'Phos-CCAGCAGATGCAGTCTACGGACAGAAAG-3' | 5'Phos-CTTCCATTTGAATCCAATCCCCCATGGA-3'  |
| S149E           | pEGFP-C1-G3BP1-S99P-S149E | 5'Phos-GGGGCTTCTCTCTAACACAACCAGG-3'    | 5'Phos-ATCACCTGGACTACCACACCATCATTAGC-3' |

Table S2. **List of antibodies used in this study**

| <b>Antigen</b>  | <b>Species</b> | <b>Catalog number (clone)</b>      | <b>Source</b>                |
|-----------------|----------------|------------------------------------|------------------------------|
| Actin           | Mouse          | Sc-8432                            | Santa Cruz Biotechnology     |
| Caprin1         | Rabbit         | 15112-1-AP                         | Proteintech Group            |
| eIF4G1          | Rabbit         | Sc-11373                           | Santa Cruz Biotechnology     |
| eIF3b           | Goat           | Sc-16377 (N-20)                    | Santa Cruz Biotechnology     |
| Flag            | Mouse          | F3165                              | Sigma-Aldrich                |
| GAPDH           | Mouse          | Sc-47724                           | Santa Cruz Biotechnology     |
| G3BP1 Epitope   | Mouse          | Sc-81940 (TT-Y) Recombinant hG3BP1 | Santa Cruz Biotechnology     |
| G3BP1 Epitope   | Mouse          | Sc-365338 (H-10) aa 158-251 hG3BP1 | Santa Cruz Biotechnology     |
| G3BP1 Epitope   | Mouse          | 611126 aa 210-323 hG3BP1           | BD Transduction Laboratories |
| phos-G3BP1-S149 | Rabbit         | G8046                              | Sigma-Aldrich                |
| GFP             | Rabbit         | ab290                              | Abcam                        |
| GFP             | Chicken        | G160                               | ABM                          |
| HA              | Mouse          | MMS-101R                           | Covance                      |
| Sequestosome-1  | Mouse          | Sc-28359                           | Santa Cruz Biotechnology     |
| TIA1            | Goat           | sc-1751                            | Santa Cruz Biotechnology     |
| USP10           | Rabbit         | A300-900A                          | Bethyl Laboratories          |
| USP10           | Rabbit         | A300-901A1                         | Bethyl Laboratories          |
| Ubiquitin       | Mouse          | Sc-271289                          | Santa Cruz Biotechnology     |
